# Supplementary material for: Genome-wide association study in chondrocalcinosis reveals ENPP1 as a candidate therapeutic target in calcium pyrophosphate deposition disease
Source: bioRxiv or medRxiv preprint supplement (doi:10.1101/2024.10.10.24315203), 2024-10-11

Figure S1

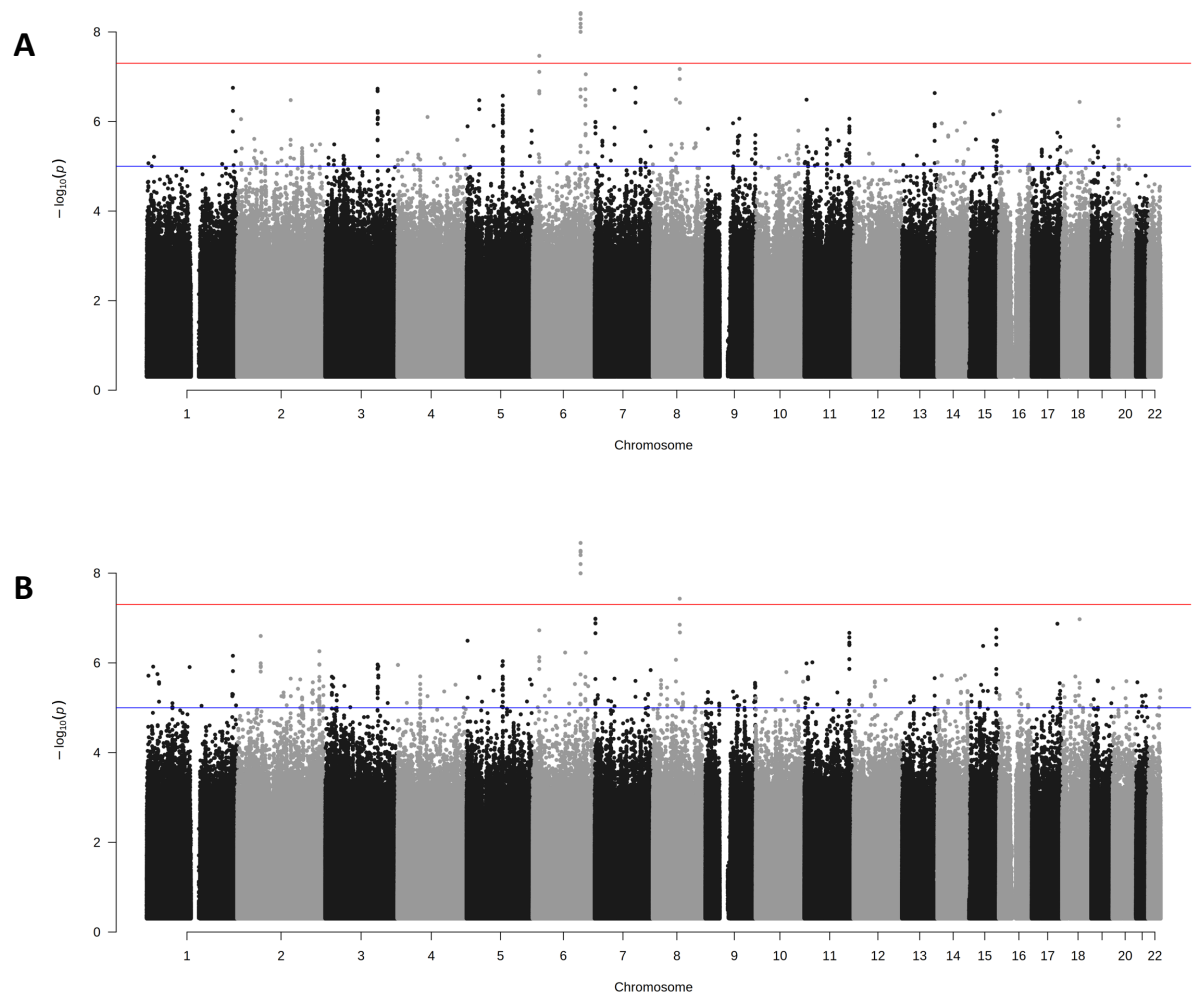

Figure S1 cont.

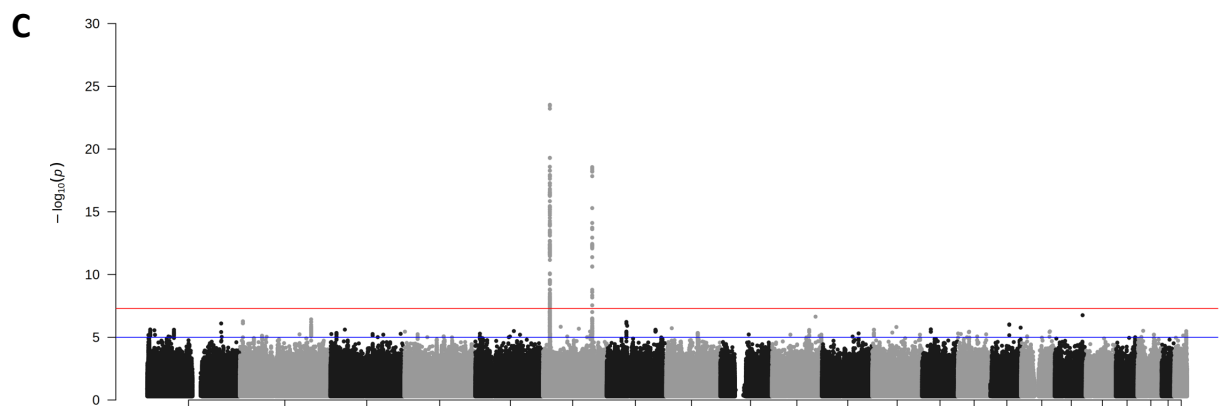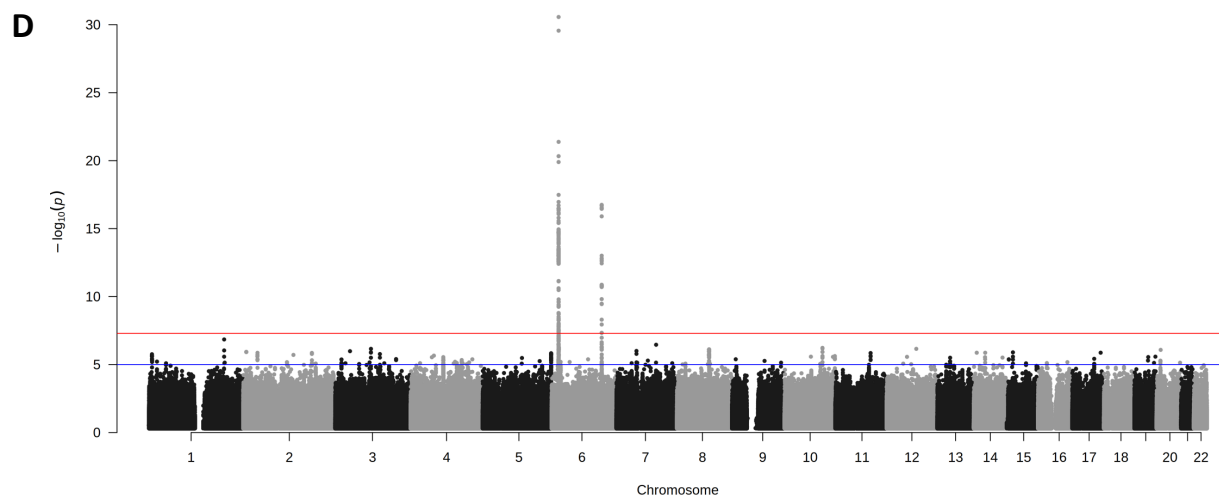

Figure S1 cont.

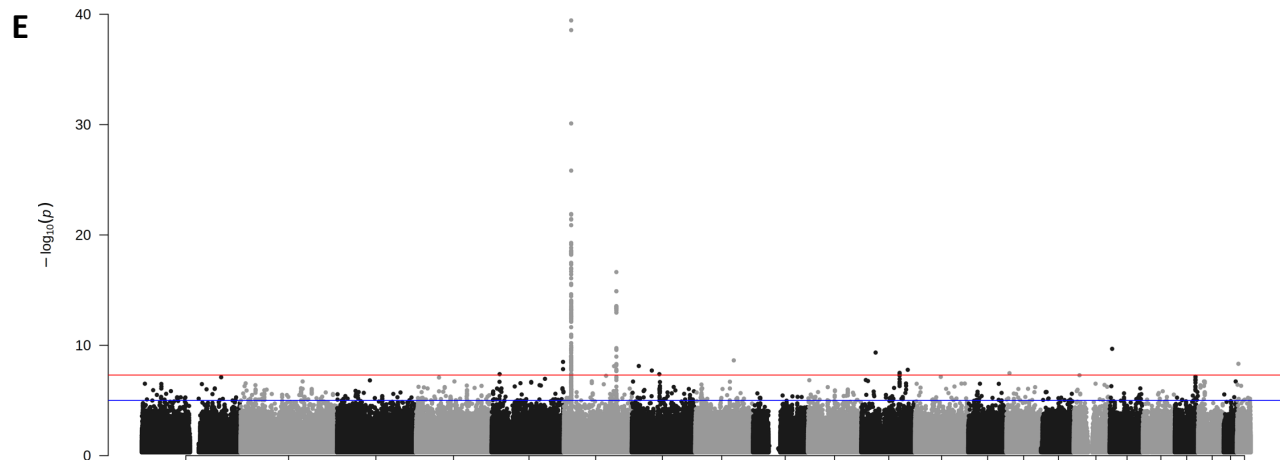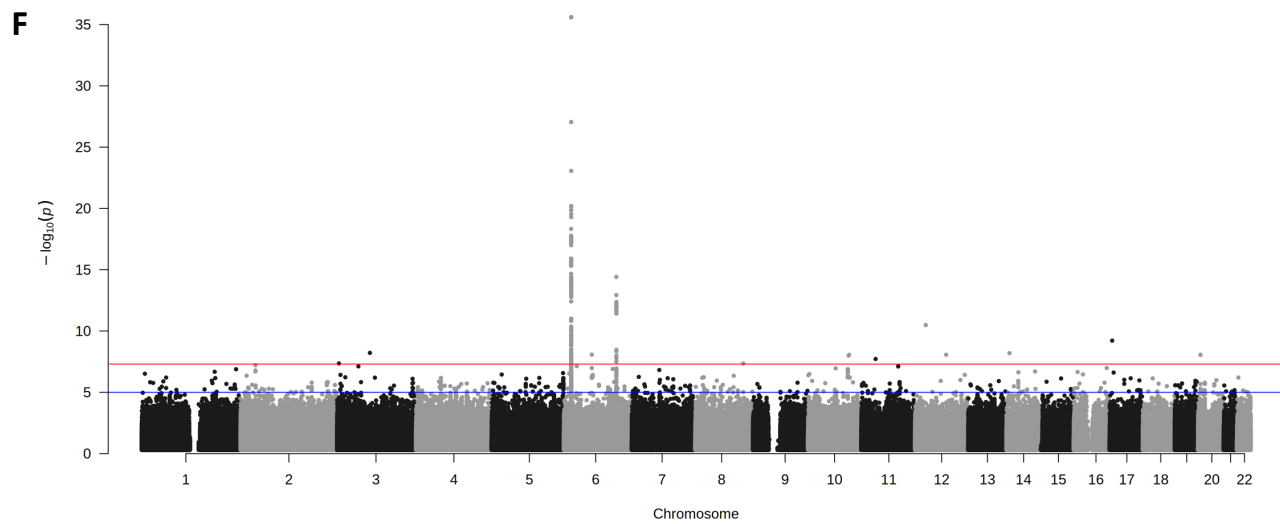

Figure S2

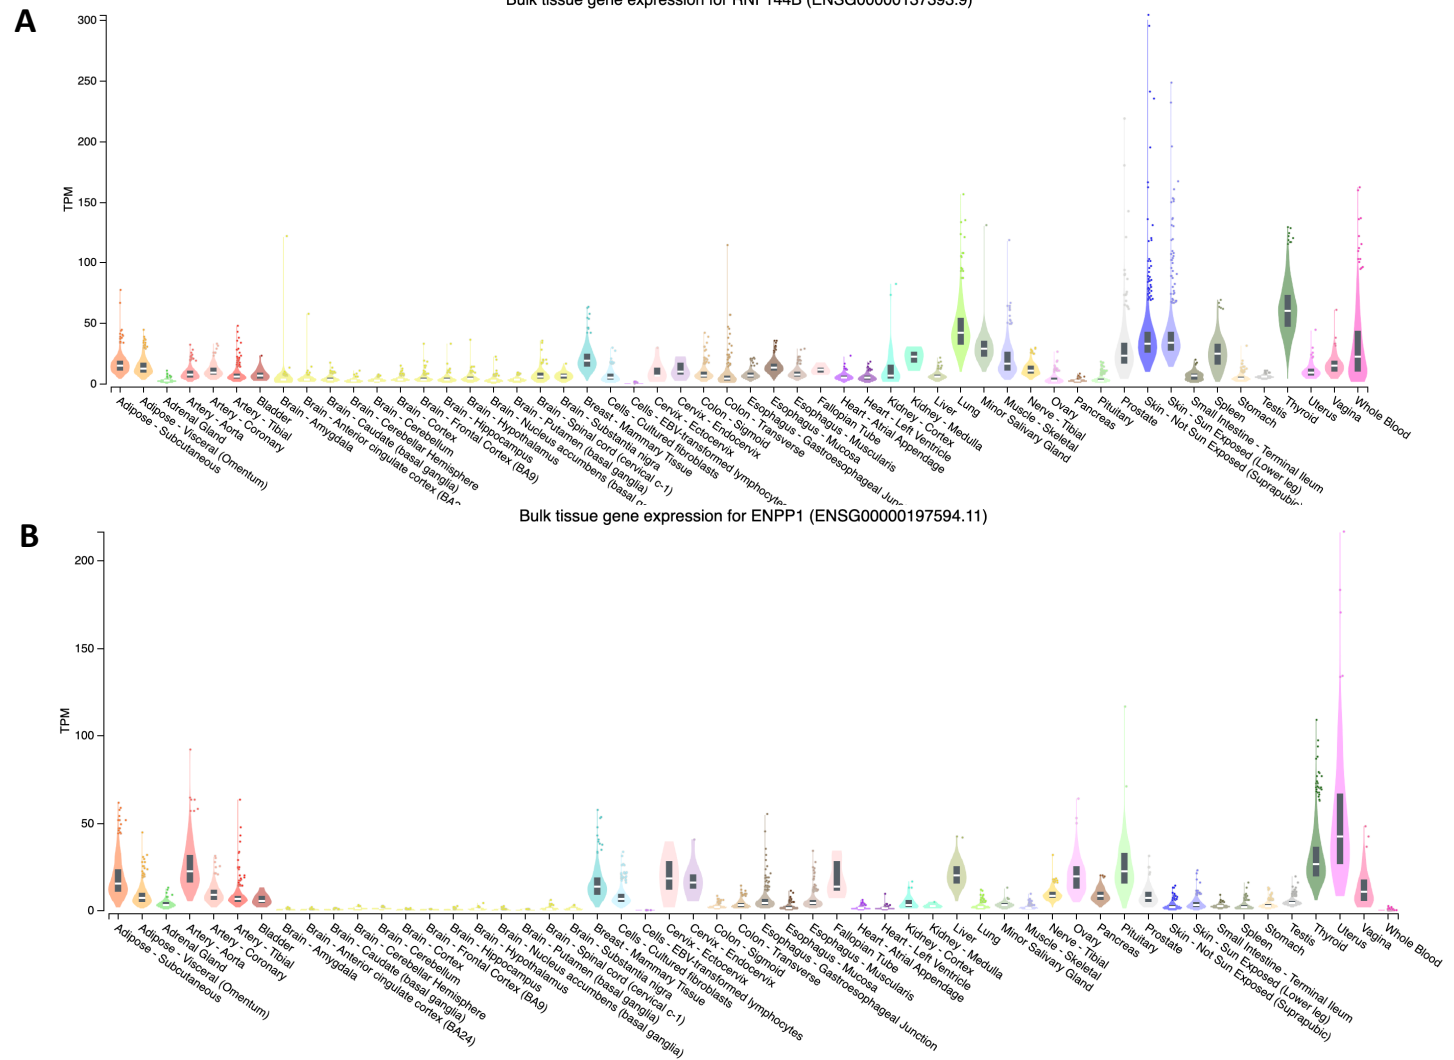

Figure S2 cont.

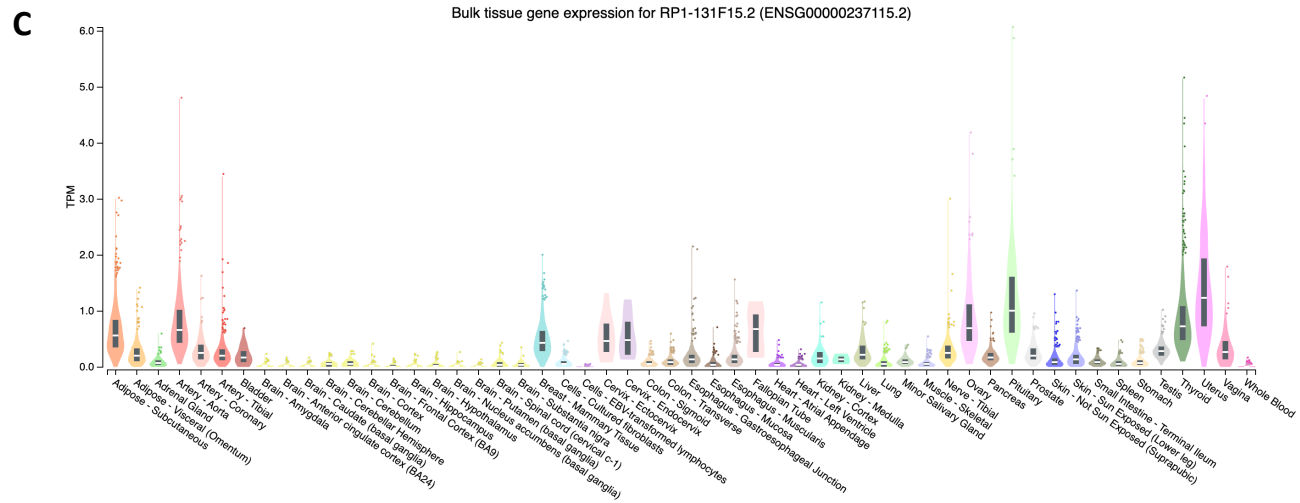

Figure S3

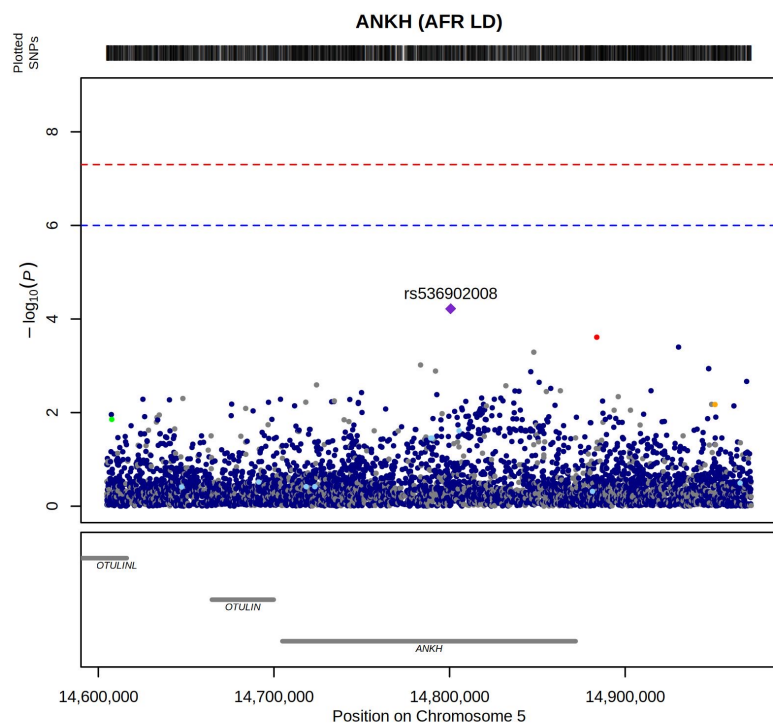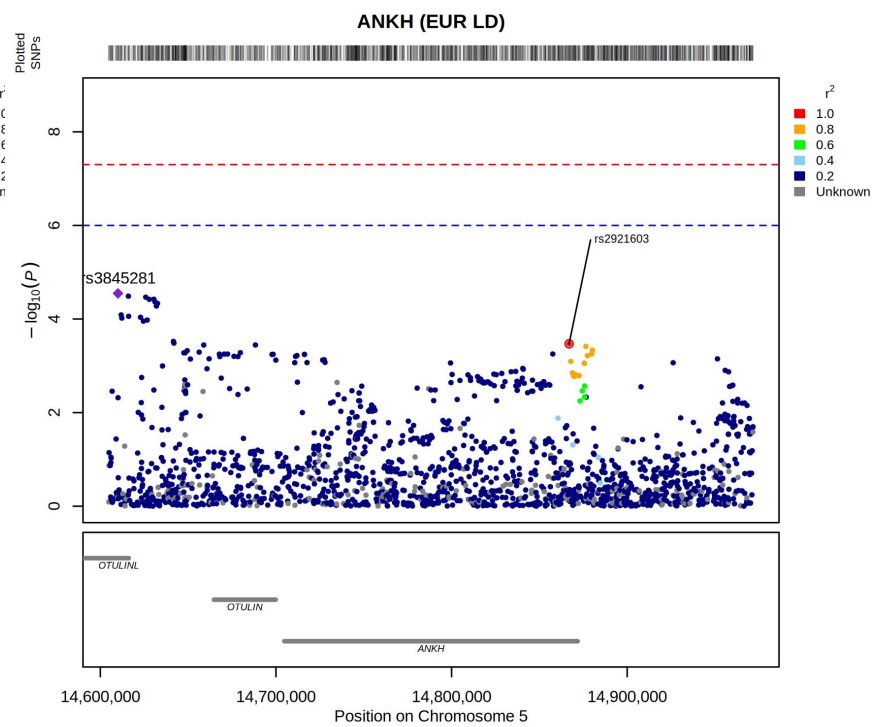

Figure S4  
CA

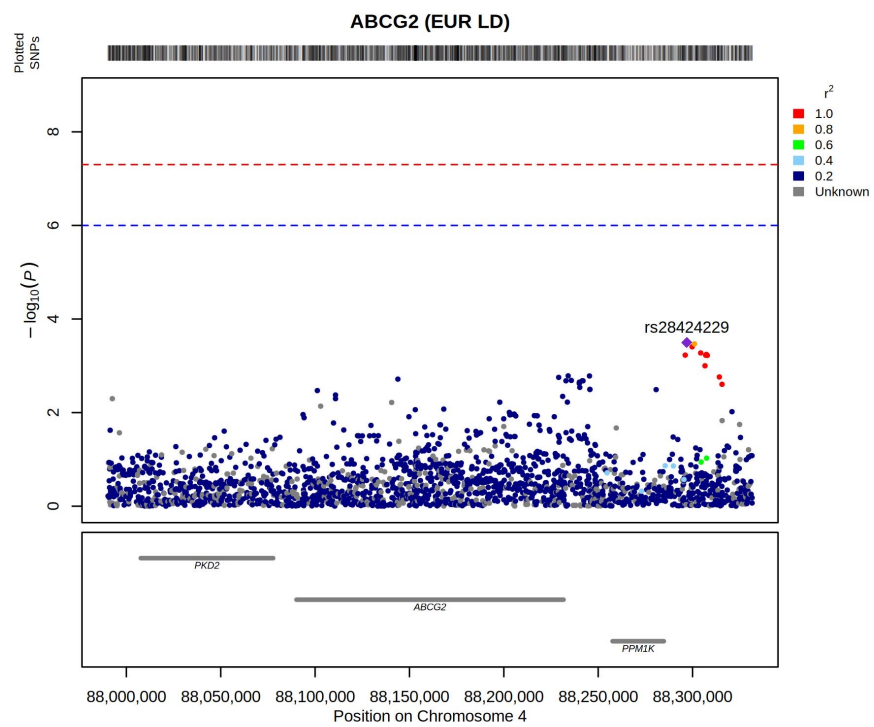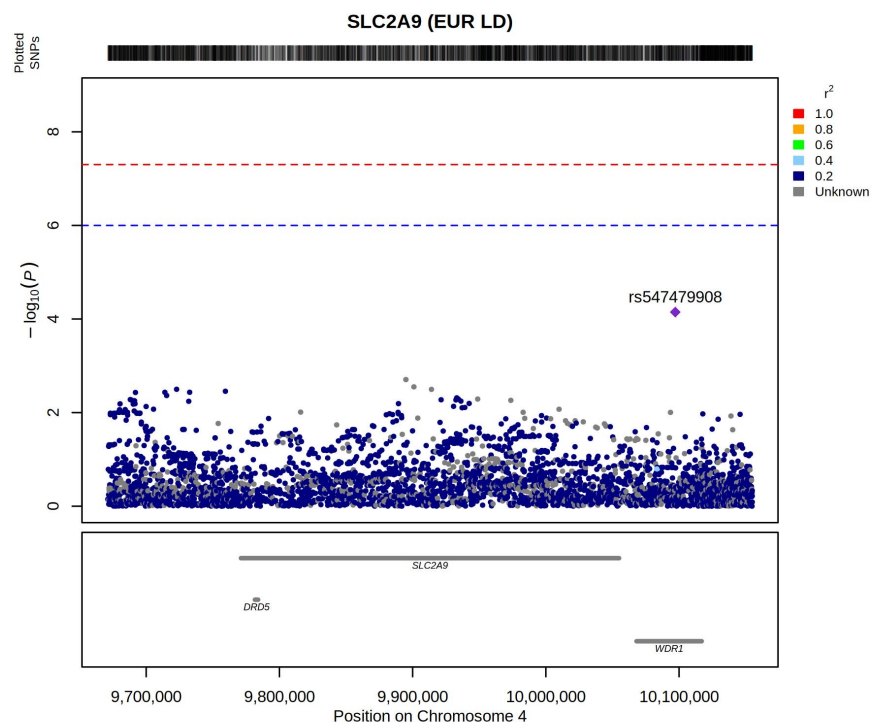

Supplement: Supplementary file [file media-1.pdf]
